# Supplementary material for: Association of moderate and vigorous physical activity with incidence of type 2 diabetes and subsequent mortality: 27 year follow-up of the Whitehall II study
Source: PubMed Central journal article supplement (PMC6997261; doi:10.1007/s00125-019-05050-1), 2019-12-02
Supplement: 125_2019_5050_MOESM1_ESM.pdf [file 125_2019_5050_MOESM1_ESM.pdf]

ESM Table 1: Association of MPA and VPA with incident type 2 diabetes<sup>a</sup> using imputed data (N=10208)

| Activity Level                                                 | N cases/<br>N total | Unadjusted        |                   | Adjusted for<br>sociodemographic and<br>behavioural variables <sup>b</sup> |                   | Additionally adjusted for<br>BMI |                   | Fully adjusted <sup>c</sup> |                   |
|----------------------------------------------------------------|---------------------|-------------------|-------------------|----------------------------------------------------------------------------|-------------------|----------------------------------|-------------------|-----------------------------|-------------------|
|                                                                |                     | HR (95% CI)       | <i>P</i><br>value | HR (95% CI)                                                                | <i>P</i><br>value | HR (95% CI)                      | <i>P</i><br>value | HR (95% CI)                 | <i>P</i><br>value |
| <b>MPA</b>                                                     |                     |                   |                   |                                                                            |                   |                                  |                   |                             |                   |
| 0 hour/week                                                    | 394/1963            | 1.00 (ref)        |                   | 1.00 (ref)                                                                 |                   | 1.00 (ref)                       |                   | 1.00 (ref)                  |                   |
| 1 hour/week                                                    | 291/2133            | 0.54 (0.46-0.63)* | <0.001            | 0.82 (0.70-0.96)*                                                          | 0.013             | 0.86 (0.74-1.00)*                | 0.048             | 0.87 (0.74-1.02)            | 0.081             |
| 2 hours/week                                                   | 347/2177            | 0.65 (0.56-0.75)* | <0.001            | 0.96 (0.83-1.12)                                                           | 0.625             | 1.01 (0.90-1.12)                 | 0.904             | 1.01 (0.87-1.17)            | 0.902             |
| 3-4 hours/week                                                 | 291/2029            | 0.58 (0.50-0.68)* | <0.001            | 0.85 (0.73-1.00)*                                                          | 0.047             | 0.87 (0.74-1.01)                 | 0.062             | 0.87 (0.74-1.01)            | 0.075             |
| ≥5 hours/week                                                  | 270/1906            | 0.57 (0.49-0.67)* | <0.001            | 0.82 (0.69-0.96)*                                                          | 0.016             | 0.84 (0.72-0.98)*                | 0.028             | 0.83 (0.71-0.98)*           | 0.031             |
| <b>VPA</b>                                                     |                     |                   |                   |                                                                            |                   |                                  |                   |                             |                   |
| 0 hour/week                                                    | 999/5787            | 1.00 (ref)        |                   | 1.00 (ref)                                                                 |                   | 1.00 (ref)                       |                   | 1.00 (ref)                  |                   |
| 1 hour/week                                                    | 311/2252            | 0.67 (0.59-0.76)* | <0.001            | 0.87 (0.76-1.00)*                                                          | 0.045             | 0.92 (0.80-1.05)                 | 0.207             | 0.93 (0.81-1.06)            | 0.273             |
| ≥2 hours/week                                                  | 283/2169            | 0.64 (0.56-0.73)* | <0.001            | 0.81 (0.70-0.93)*                                                          | 0.003             | 0.85 (0.74-0.97)*                | 0.019             | 0.86 (0.75-0.98)*           | 0.029             |
| <b>Physically inactive vs active<sup>d</sup></b>               |                     |                   |                   |                                                                            |                   |                                  |                   |                             |                   |
| Inactive (No MVPA)                                             | 345/1644            | 1.00 (ref)        |                   | 1.00 (ref)                                                                 |                   | 1.00 (ref)                       |                   | 1.00 (ref)                  |                   |
| Active (Any MVPA)                                              | 1248/8564           | 0.55 (0.48-0.61)* | <0.001            | 0.80 (0.70-0.91)*                                                          | 0.001             | 0.85 (0.75-0.97)*                | 0.013             | 0.85 (0.75-0.97)*           | 0.017             |
| <b>Following physical activity recommendations<sup>e</sup></b> |                     |                   |                   |                                                                            |                   |                                  |                   |                             |                   |
| No                                                             | 794/4690            | 1.00 (ref)        |                   | 1.00 (ref)                                                                 |                   | 1.00 (ref)                       |                   | 1.00 (ref)                  |                   |
| Yes                                                            | 799/5518            | 0.77 (0.70-0.85)* | <0.001            | 0.89 (0.81-0.99)*                                                          | 0.030             | 0.90 (0.81-1.00)*                | 0.043             | 0.90 (0.81-1.00)*           | 0.045             |

Data are presented as HR (95% CI) for mean follow-up of 26.8 (SD 6.3) years

MPA, moderate intensity physical activity; VPA, vigorous intensity activity

<sup>a</sup>Using interval-censored, illness-death model

<sup>b</sup>Adjusted for age (as time-scale), sex, ethnicity, marital status, education, occupational position, smoking status, alcohol consumption, fruits and vegetables intake and mutual adjustment for MPA and VPA in analysis on these variables

<sup>c</sup>Additionally adjusted for hypertension, total cholesterol, CVD drugs and prevalent CVD

<sup>d</sup>Inactive “0 hour/week of MVPA”; Active “>0 hours/week of MVPA”

<sup>e</sup>No “<3 hours/week of MVPA and <2 hours/week of VPA”; Yes “≥3 hours/week of MVPA or ≥2 hours/week of VPA”

\**p*< 0.05, all exact *p* values presented to take into account multiple testing

ESM Table 2: Association of MPA and VPA with incident type 2 diabetes using Cox regression<sup>a</sup> (N=9987)

| Activity Level                                                 | N cases/<br>N total | Unadjusted        |                   | Adjusted for<br>sociodemographic and<br>behavioural variables <sup>b</sup> |                   | Additionally adjusted for<br>BMI |                   | Fully adjusted <sup>c</sup> |                   |
|----------------------------------------------------------------|---------------------|-------------------|-------------------|----------------------------------------------------------------------------|-------------------|----------------------------------|-------------------|-----------------------------|-------------------|
|                                                                |                     | HR (95% CI)       | <i>P</i><br>value | HR (95% CI)                                                                | <i>P</i><br>value | HR (95% CI)                      | <i>P</i><br>value | HR (95% CI)                 | <i>P</i><br>value |
| <b>MPA</b>                                                     |                     |                   |                   |                                                                            |                   |                                  |                   |                             |                   |
| 0 hour/week                                                    | 381/1894            | 1.00 (ref)        |                   | 1.00 (ref)                                                                 |                   | 1.00 (ref)                       |                   | 1.00 (ref)                  |                   |
| 1 hour/week                                                    | 286/2112            | 0.62 (0.54-0.73)* | <0.001            | 0.83 (0.71-0.98)*                                                          | 0.025             | 0.88 (0.75-1.03)                 | 0.112             | 0.88 (0.75-1.03)            | 0.113             |
| 2 hours/week                                                   | 340/2145            | 0.74 (0.64-0.86)* | <0.001            | 0.97 (0.83-1.14)                                                           | 0.732             | 1.02 (0.87-1.19)                 | 0.833             | 1.01 (0.87-1.18)            | 0.880             |
| 3-4 hours/week                                                 | 283/1988            | 0.66 (0.57-0.77)* | <0.001            | 0.85 (0.73-1.01)                                                           | 0.060             | 0.88 (0.75-1.04)                 | 0.133             | 0.88 (0.75-1.03)            | 0.120             |
| ≥5 hours/week                                                  | 263/1848            | 0.66 (0.57-0.78)* | <0.001            | 0.87 (0.73-1.03)                                                           | 0.093             | 0.90 (0.76-1.07)                 | 0.222             | 0.89 (0.75-1.05)            | 0.173             |
| <b>VPA</b>                                                     |                     |                   |                   |                                                                            |                   |                                  |                   |                             |                   |
| 0 hour/week                                                    | 981/5688            | 1.00 (ref)        |                   | 1.00 (ref)                                                                 |                   | 1.00 (ref)                       |                   | 1.00 (ref)                  |                   |
| 1 hour/week                                                    | 302/2207            | 0.76 (0.66-0.86)* | <0.001            | 0.91 (0.80-1.05)                                                           | 0.191             | 0.95 (0.83-1.09)                 | 0.503             | 0.96 (0.84-1.11)            | 0.597             |
| ≥2 hours/week                                                  | 270/2092            | 0.71 (0.62-0.81)* | <0.001            | 0.84 (0.73-0.96)*                                                          | 0.014             | 0.88 (0.76-1.01)                 | 0.068             | 0.89 (0.77-1.03)            | 0.109             |
| <b>Physically inactive vs active<sup>d</sup></b>               |                     |                   |                   |                                                                            |                   |                                  |                   |                             |                   |
| Inactive (No MVPA)                                             | 339/1607            | 1.00 (ref)        |                   | 1.00 (ref)                                                                 |                   | 1.00 (ref)                       |                   | 1.00 (ref)                  |                   |
| Active (Any MVPA)                                              | 1214/8380           | 0.63 (0.56-0.71)* | <0.001            | 0.83 (0.73-0.94)*                                                          | 0.004             | 0.88 (0.77-1.00)                 | 0.058             | 0.88 (0.77-1.00)            | 0.058             |
| <b>Following physical activity recommendations<sup>e</sup></b> |                     |                   |                   |                                                                            |                   |                                  |                   |                             |                   |
| No                                                             | 777/4613            | 1.00 (ref)        |                   | 1.00 (ref)                                                                 |                   | 1.00 (ref)                       |                   | 1.00 (ref)                  |                   |
| Yes                                                            | 776/5374            | 0.83 (0.75-0.91)* | <0.001            | 0.92 (0.83-1.02)                                                           | 0.121             | 0.94 (0.85-1.04)                 | 0.233             | 0.94 (0.85-1.04)            | 0.245             |

Data are presented as HR (95% CI) for mean followUp of 27.1 (SD 6.3) years

MPA, moderate intensity physical activity; VPA, vigorous intensity activity

<sup>a</sup>Instead of interval-censored, illness-death model

<sup>b</sup>Adjusted for age (as time-scale), sex, ethnicity, marital status, education, occupational position, smoking status, alcohol consumption, fruits & vegetables intake and mutual adjustment for MPA and VPA in analysis on these variables

<sup>c</sup>Additionally adjusted for hypertension, total cholesterol, CVD drugs and prevalent CVD

<sup>d</sup>Inactive “0 hour/week of MVPA”; Active “>0 hours/week of MVPA”

<sup>e</sup>No “<3 hours/week of MVPA and <2 hours/week of VPA”; Yes “≥3 hours/week of MVPA or ≥2 hours/week of VPA”

\**p*< 0.05, all exact *p* values presented to take into account multiple testing

ESM Table 3: Sample characteristics for the analysis of moderate-to-vigorous physical activity post-diabetes diagnosis with subsequent mortality (N=1026)

| Characteristics                          | Total population | Moderate-to-vigorous physical activity (MVPA) <sup>a</sup> |                          |                              | <i>p</i> value |
|------------------------------------------|------------------|------------------------------------------------------------|--------------------------|------------------------------|----------------|
|                                          |                  | Inactive<br>(No MVPA)                                      | Below<br>recommendations | Following<br>recommendations |                |
| <b>N (row %)</b>                         | 1026             | 177 (17.3)                                                 | 403 (39.3)               | 446 (43.5)                   |                |
| Age (years), M(SD)                       | 65.7 (8.1)       | 66.0 (9.4)                                                 | 65.6 (7.7)               | 65.8 (7.9)                   | 0.934          |
| Non-white                                | 205 (20.0)       | 55 (31.1)                                                  | 80 (19.9)                | 70 (15.7)                    | <0.001         |
| Female                                   | 317 (30.9)       | 73 (41.2)                                                  | 141 (35.0)               | 103 (23.1)                   | <0.001         |
| Married/cohabitating                     | 735 (71.6)       | 104 (58.8)                                                 | 290 (72.0)               | 341 (76.5)                   | <0.001         |
| University degree or higher              | 250 (24.4)       | 42 (23.7)                                                  | 105 (26.1)               | 103 (23.1)                   | 0.590          |
| Low occupational position                | 189 (18.4)       | 66 (37.3)                                                  | 77 (19.1)                | 46 (10.3)                    | <0.001         |
| Current smokers                          | 75 (7.3)         | 17 (9.6)                                                   | 31 (7.7)                 | 27 (6.1)                     | 0.286          |
| >14 units of alcohol per week            | 208 (20.3)       | 25 (14.1)                                                  | 85 (21.1)                | 98 (22.0)                    | 0.078          |
| <daily fruits & vegetables intake        | 262 (25.5)       | 71 (40.1)                                                  | 104 (25.8)               | 87 (19.5)                    | <0.001         |
| BMI $\geq$ 30.0 kg/m <sup>2</sup>        | 353 (34.4)       | 74 (41.8)                                                  | 150 (37.2)               | 129 (28.9)                   | 0.003          |
| Hypertension                             | 677 (66.0)       | 121 (68.4)                                                 | 274 (65.2)               | 282 (65.7)                   | 0.755          |
| Total cholesterol (mmol/L), M(SD)        | 5.0 (1.3)        | 5.2 (1.3)                                                  | 5.1 (1.4)                | 4.9 (1.2)                    | 0.015          |
| CVD drugs                                | 745 (72.6)       | 132 (74.6)                                                 | 299 (71.2)               | 314 (73.2)                   | 0.656          |
| Prevalent CVD                            | 79 (7.7)         | 20 (11.3)                                                  | 27 (6.7)                 | 32 (7.1)                     | 0.138          |
| Physical component score of SF-36, M(SD) | 44.7 (10.6)      | 40.5 (11.9)                                                | 44.3 (10.7)              | 46.6 (9.3)                   | <0.001         |
| Mental component score of SF-36, M(SD)   | 52.3 (9.2)       | 50.5 (10.7)                                                | 51.6 (9.5)               | 53.8 (7.8)                   | 0.002          |

Data are presented as n (column %) unless otherwise indicated

<sup>a</sup>Inactive “0 hour/week of MVPA”; Below recommendations “0.1 to 2.4 hours/week of MVPA and <1.25 hours/week of VPA”; Following recommendations “ $\geq$ 2.5 hours/week of MVPA or  $\geq$ 1.25 hours/week of VPA”

ESM Table 4: Association of MVPA<sup>a</sup> with all-cause and CVD mortality excluding participants with MVPA measurement assessed more than 6 years post-diabetes diagnosis (N=939)

| Outcome/activity                                               | N cases/<br>N total | Unadjusted        |                   | Adjusted for<br>sociodemographic and<br>behavioural variables <sup>b</sup> |                   | Additionally adjusted for<br>BMI |                   | Fully adjusted <sup>c</sup> |                   |
|----------------------------------------------------------------|---------------------|-------------------|-------------------|----------------------------------------------------------------------------|-------------------|----------------------------------|-------------------|-----------------------------|-------------------|
|                                                                |                     | HR (95% CI)       | <i>p</i><br>value | HR (95% CI)                                                                | <i>p</i><br>value | HR (95% CI)                      | <i>p</i><br>value | HR (95% CI)                 | <i>p</i><br>value |
| <b>Outcome: All-cause mortality</b>                            |                     |                   |                   |                                                                            |                   |                                  |                   |                             |                   |
| <b>MVPA category<sup>d</sup></b>                               |                     |                   |                   |                                                                            |                   |                                  |                   |                             |                   |
| Inactive (No MVPA)                                             | 35/157              | 1.00 (ref)        |                   | 1.00 (ref)                                                                 |                   | 1.00 (ref)                       |                   | 1.00 (ref)                  |                   |
| Below recommendations                                          | 61/370              | 0.70 (0.46-1.05)  | 0.087             | 0.69 (0.44-1.08)                                                           | 0.102             | 0.68 (0.43-1.06)                 | 0.091             | 0.70 (0.44-1.12)            | 0.138             |
| Following recommendations                                      | 50/412              | 0.51 (0.33-0.79)* | 0.002             | 0.59 (0.36-0.97)*                                                          | 0.036             | 0.59 (0.36-0.97)*                | 0.039             | 0.62 (0.36-1.04)            | 0.070             |
| <b>Physically inactive vs Active<sup>e</sup></b>               |                     |                   |                   |                                                                            |                   |                                  |                   |                             |                   |
| Inactive (No MVPA)                                             | 35/157              | 1.00 (ref)        |                   | 1.00 (ref)                                                                 |                   | 1.00 (ref)                       |                   | 1.00 (ref)                  |                   |
| Active (Any MVPA)                                              | 111/782             | 0.60 (0.41-0.88)* | 0.009             | 0.65 (0.42-0.99)*                                                          | 0.046             | 0.64 (0.41-0.99)*                | 0.045             | 0.67 (0.42-1.05)            | 0.081             |
| <b>Following physical activity recommendations<sup>f</sup></b> |                     |                   |                   |                                                                            |                   |                                  |                   |                             |                   |
| No                                                             | 96/527              | 1.00 (ref)        |                   | 1.00 (ref)                                                                 |                   | 1.00 (ref)                       |                   | 1.00 (ref)                  |                   |
| Yes                                                            | 50/412              | 0.66 (0.47-0.92)* | 0.014             | 0.77 (0.54-1.11)                                                           | 0.161             | 0.78 (0.54-1.13)                 | 0.190             | 0.80 (0.55-1.17)            | 0.250             |
| <b>Outcome: CVD mortality</b>                                  |                     |                   |                   |                                                                            |                   |                                  |                   |                             |                   |
| <b>MVPA category<sup>d</sup></b>                               |                     |                   |                   |                                                                            |                   |                                  |                   |                             |                   |
| Inactive (No MVPA)                                             | 12/157              | 1.00 (ref)        |                   | 1.00 (ref)                                                                 |                   | 1.00 (ref)                       |                   | 1.00 (ref)                  |                   |
| Below recommendations                                          | 23/370              | 0.81 (0.40-1.62)  | 0.545             | 0.89 (0.42-1.90)                                                           | 0.772             | 0.93 (0.44-2.00)                 | 0.859             | 1.01 (0.45-2.28)            | 0.979             |
| Following recommendations                                      | 10/412              | 0.32 (0.14-0.76)* | 0.010             | 0.40 (0.15-1.10)                                                           | 0.076             | 0.41 (0.15-1.12)                 | 0.083             | 0.45 (0.17-1.22)            | 0.118             |
| <b>Physically inactive vs Active<sup>e</sup></b>               |                     |                   |                   |                                                                            |                   |                                  |                   |                             |                   |
| Inactive (No MVPA)                                             | 12/157              | 1.00 (ref)        |                   | 1.00 (ref)                                                                 |                   | 1.00 (ref)                       |                   | 1.00 (ref)                  |                   |
| Active (Any MVPA)                                              | 33/782              | 0.55 (0.28-1.07)  | 0.080             | 0.68 (0.31-1.46)                                                           | 0.321             | 0.70 (0.32-1.54)                 | 0.377             | 0.77 (0.34-1.76)            | 0.541             |
| <b>Following physical activity recommendations<sup>f</sup></b> |                     |                   |                   |                                                                            |                   |                                  |                   |                             |                   |
| No                                                             | 35/527              | 1.00 (ref)        |                   | 1.00 (ref)                                                                 |                   | 1.00 (ref)                       |                   | 1.00 (ref)                  |                   |
| Yes                                                            | 10/412              | 0.37 (0.18-0.76)* | 0.006             | 0.44 (0.20-0.94)*                                                          | 0.035             | 0.43 (0.20-0.92)*                | 0.031             | 0.45 (0.22-0.92)*           | 0.030             |

Data are presented as HR (95% CI) for mean follow-up of 9.0 (SD 6.1) years, estimated using inverse probabilities weighted cox regression models

<sup>a</sup>MVPA was taken at the first wave with available measurement after diabetes diagnosis

<sup>b</sup>Adjusted for age (as time-scale), sex, ethnicity, marital status, education, occupational position, smoking status, alcohol consumption, fruits & vegetables intake

<sup>c</sup>Additionally adjusted for hypertension, total cholesterol, SF-36 mental and physical component summary scores, CVD drugs and prevalent CVD

<sup>d</sup>Inactive “0 hour/week of MVPA”; Below recommendations “0.1 to 2.4 hours/week of MVPA and <1.25 hours/week of VPA”; Following recommendations “≥2.5 hours/week of MVPA or ≥1.25 hours/week of VPA”

<sup>e</sup>Inactive “0 hour/week of MVPA”; Active “>0 hour/week of MVPA”

<sup>f</sup>No “<2.5 hours/week of MVPA and <1.25 hours/week of VPA”; Yes “≥2.5 hours/week of MVPA or ≥1.25 hours/week of VPA” \**p*<0.05

ESM Table 5: Association of MVPA<sup>a</sup> post-diabetes diagnosis with CVD mortality, excluding participants with prevalent CVD (N=947)

| Outcome/activity                                               | N cases/<br>N total | Unadjusted        |                   | Adjusted for<br>sociodemographic and<br>behavioural variables <sup>b</sup> |                   | Additionally adjusted for<br>BMI |                   | Fully adjusted <sup>c</sup> |                   |
|----------------------------------------------------------------|---------------------|-------------------|-------------------|----------------------------------------------------------------------------|-------------------|----------------------------------|-------------------|-----------------------------|-------------------|
|                                                                |                     | HR (95% CI)       | <i>p</i><br>value | HR (95% CI)                                                                | <i>p</i><br>value | HR (95% CI)                      | <i>p</i><br>value | HR (95% CI)                 | <i>p</i><br>value |
| <b>Outcome: CVD mortality</b>                                  |                     |                   |                   |                                                                            |                   |                                  |                   |                             |                   |
| <b>MVPA categories<sup>d</sup></b>                             |                     |                   |                   |                                                                            |                   |                                  |                   |                             |                   |
| Inactive                                                       | 12/157              | 1.00 (ref)        |                   | 1.00 (ref)                                                                 |                   | 1.00 (ref)                       |                   | 1.00 (ref)                  |                   |
| Below recommendations                                          | 23/376              | 0.75 (0.37-1.52)  | 0.430             | 0.84 (0.39-1.78)                                                           | 0.643             | 0.86 (0.40-1.85)                 | 0.698             | 0.96 (0.42-2.23)            | 0.928             |
| Following recommendations                                      | 12/414              | 0.35 (0.15-0.81)* | 0.014             | 0.45 (0.18-1.15)                                                           | 0.094             | 0.45 (0.18-1.16)                 | 0.100             | 0.53 (0.20-1.41)            | 0.202             |
| <b>Physically inactive vs active<sup>e</sup></b>               |                     |                   |                   |                                                                            |                   |                                  |                   |                             |                   |
| Inactive (No MVPA)                                             | 12/157              | 1.00 (ref)        |                   | 1.00 (ref)                                                                 |                   | 1.00 (ref)                       |                   | 1.00 (ref)                  |                   |
| Active (Any MVPA)                                              | 35/790              | 0.54 (0.28-1.06)  | 0.074             | 0.66 (0.31-1.41)                                                           | 0.283             | 0.67 (0.31-1.46)                 | 0.318             | 0.78 (0.33-1.80)            | 0.556             |
| <b>Following physical activity recommendations<sup>f</sup></b> |                     |                   |                   |                                                                            |                   |                                  |                   |                             |                   |
| No                                                             | 35/533              | 1.00 (ref)        |                   | 1.00 (ref)                                                                 |                   | 1.00 (ref)                       |                   | 1.00 (ref)                  |                   |
| Yes                                                            | 12/414              | 0.43 (0.22-0.83)* | 0.012             | 0.51 (0.25-1.05)                                                           | 0.067             | 0.51 (0.25-1.03)                 | 0.062             | 0.54 (0.27-1.09)            | 0.084             |

Data are presented as HR (95% CI), estimated using inverse probabilities weighted cox regression models

<sup>a</sup>MVPA was taken at the first wave with available measurement after diabetes diagnosis

<sup>b</sup>Adjusted for age (as time-scale), sex, ethnicity, marital status, education, occupational position, smoking status, alcohol consumption, fruits & vegetables intake

<sup>c</sup>Additionally adjusted for hypertension, total cholesterol, SF-36 mental and physical component summary scores, CVD drugs

<sup>d</sup>Inactive “0 hour/week of MVPA”; Below recommendations “0.1 to 2.4 hours/week of MVPA and <1.25 hours/week of VPA”; Following recommendations “≥2.5 hours/week of MVPA or ≥1.25 hours/week of VPA”

<sup>e</sup>Inactive “0 hour/week of MVPA”; Active “>0 hour/week of MVPA”

<sup>f</sup>No “<2.5 hours/week of MVPA and <1.25 hours/week of VPA”; Yes “≥2.5 hours/week of MVPA or ≥1.25 hours/week of VPA”

\**p*< 0.05, all exact *p* values presented to take into account multiple testing

ESM Table 6: Association of MVPA<sup>a</sup> after diabetes diagnosis with all-cause and CVD mortality (N=1553) using multiple imputed data

| Outcome/activity                                               | Unadjusted        |                | Adjusted for sociodemographic and behavioural variables <sup>b</sup> |                | Additionally adjusted for BMI |                | Fully adjusted <sup>c</sup> |                |
|----------------------------------------------------------------|-------------------|----------------|----------------------------------------------------------------------|----------------|-------------------------------|----------------|-----------------------------|----------------|
|                                                                | HR (95% CI)       | <i>P</i> value | HR (95% CI)                                                          | <i>P</i> value | HR (95% CI)                   | <i>P</i> value | HR (95% CI)                 | <i>p</i> value |
| <b>Outcome: All-cause mortality</b>                            |                   |                |                                                                      |                |                               |                |                             |                |
| <b>MVPA categories<sup>d</sup></b>                             |                   |                |                                                                      |                |                               |                |                             |                |
| Inactive (No MVPA)                                             | 1.00 (ref)        |                | 1.00 (ref)                                                           |                | 1.00 (ref)                    |                | 1.00 (ref)                  |                |
| Below recommendations                                          | 0.70 (0.50-0.98)  | 0.037          | 0.71 (0.49-1.03)                                                     | 0.073          | 0.68 (0.46-1.03)              | 0.066          | 0.71 (0.47-1.07)            | 0.103          |
| Following recommendations                                      | 0.52 (0.35-0.77)* | 0.001          | 0.55 (0.35-0.86)*                                                    | 0.010          | 0.56 (0.36-0.86)*             | 0.008          | 0.60 (0.38-0.94)*           | 0.025          |
| <b>Physically inactive vs Active<sup>e</sup></b>               |                   |                |                                                                      |                |                               |                |                             |                |
| Inactive (No MVPA)                                             | 1.00 (ref)        |                | 1.00 (ref)                                                           |                | 1.00 (ref)                    |                | 1.00 (ref)                  |                |
| Active (Any MVPA)                                              | 0.61 (0.44-0.84)* | 0.003          | 0.64 (0.44-0.93)*                                                    | 0.020          | 0.63 (0.43-0.92)*             | 0.017          | 0.67 (0.45-0.98)*           | 0.040          |
| <b>Following physical activity recommendations<sup>f</sup></b> |                   |                |                                                                      |                |                               |                |                             |                |
| No                                                             | 1.00 (ref)        |                | 1.00 (ref)                                                           |                | 1.00 (ref)                    |                | 1.00 (ref)                  |                |
| Yes                                                            | 0.66 (0.49-0.88)* | 0.006          | 0.70 (0.51-0.96)*                                                    | 0.028          | 0.74 (0.53-1.02)              | 0.067          | 0.77 (0.55-1.08)            | 0.130          |
| <b>Outcome: CVD mortality</b>                                  |                   |                |                                                                      |                |                               |                |                             |                |
| <b>MVPA categories<sup>d</sup></b>                             |                   |                |                                                                      |                |                               |                |                             |                |
| Inactive (No MVPA)                                             | 1.00 (ref)        |                | 1.00 (ref)                                                           |                | 1.00 (ref)                    |                | 1.00 (ref)                  |                |
| Below recommendations                                          | 0.70 (0.39-1.27)  | 0.241          | 0.77 (0.41-1.44)                                                     | 0.416          | 0.83 (0.42-1.63)              | 0.591          | 0.88 (0.44-1.75)            | 0.707          |
| Following recommendations                                      | 0.35 (0.17-0.70)* | 0.004          | 0.41 (0.19-0.90)*                                                    | 0.026          | 0.37 (0.16-0.84)*             | 0.018          | 0.41 (0.18-0.96)*           | 0.041          |
| <b>Physically inactive vs Active<sup>e</sup></b>               |                   |                |                                                                      |                |                               |                |                             |                |
| Inactive (No MVPA)                                             | 1.00 (ref)        |                | 1.00 (ref)                                                           |                | 1.00 (ref)                    |                | 1.00 (ref)                  |                |
| Active (Any MVPA)                                              | 0.52 (0.29-0.92)* | 0.025          | 0.61 (0.33-1.13)                                                     | 0.115          | 0.62 (0.33-1.19)              | 0.154          | 0.68 (0.35-1.34)            | 0.267          |
| <b>Following physical activity recommendations<sup>f</sup></b> |                   |                |                                                                      |                |                               |                |                             |                |
| No                                                             | 1.00 (ref)        |                | 1.00 (ref)                                                           |                | 1.00 (ref)                    |                | 1.00 (ref)                  |                |
| Yes                                                            | 0.43 (0.24-0.78)* | 0.005          | 0.49 (0.26-0.91)*                                                    | 0.024          | 0.43 (0.22-0.82)*             | 0.011          | 0.46 (0.23-0.90)*           | 0.023          |

Data are presented as HR (95% CI), estimated using cox regression models

<sup>a</sup>MVPA was taken at the first wave with available measurement after diabetes diagnosis

<sup>b</sup>Adjusted for age (as time-scale), sex, ethnicity, marital status, education, occupational position, smoking status, alcohol consumption, fruits & vegetables intake

<sup>c</sup>Additionally adjusted for hypertension, total cholesterol, SF-36 mental and physical component summary scores, CVD drugs and prevalent CVD

<sup>d</sup>Inactive “0 hour/week of MVPA”; Below recommendations “0.1 to 2.4 hours/week of MVPA and <1.25 hours/week of VPA”; Following recommendations “≥2.5 hours/week of MVPA or ≥1.25 hours/week of VPA” <sup>e</sup>Inactive “0 hour/week of MVPA”; Active “>0 hour/week of MVPA”

<sup>f</sup>No “<2.5 hours/week of MVPA and <1.25 hours/week of VPA”; Yes “≥2.5 hours/week of MVPA or ≥1.25 hours/week of VPA”

\**p*< 0.05, all exact *p* values presented to take into account multiple testing

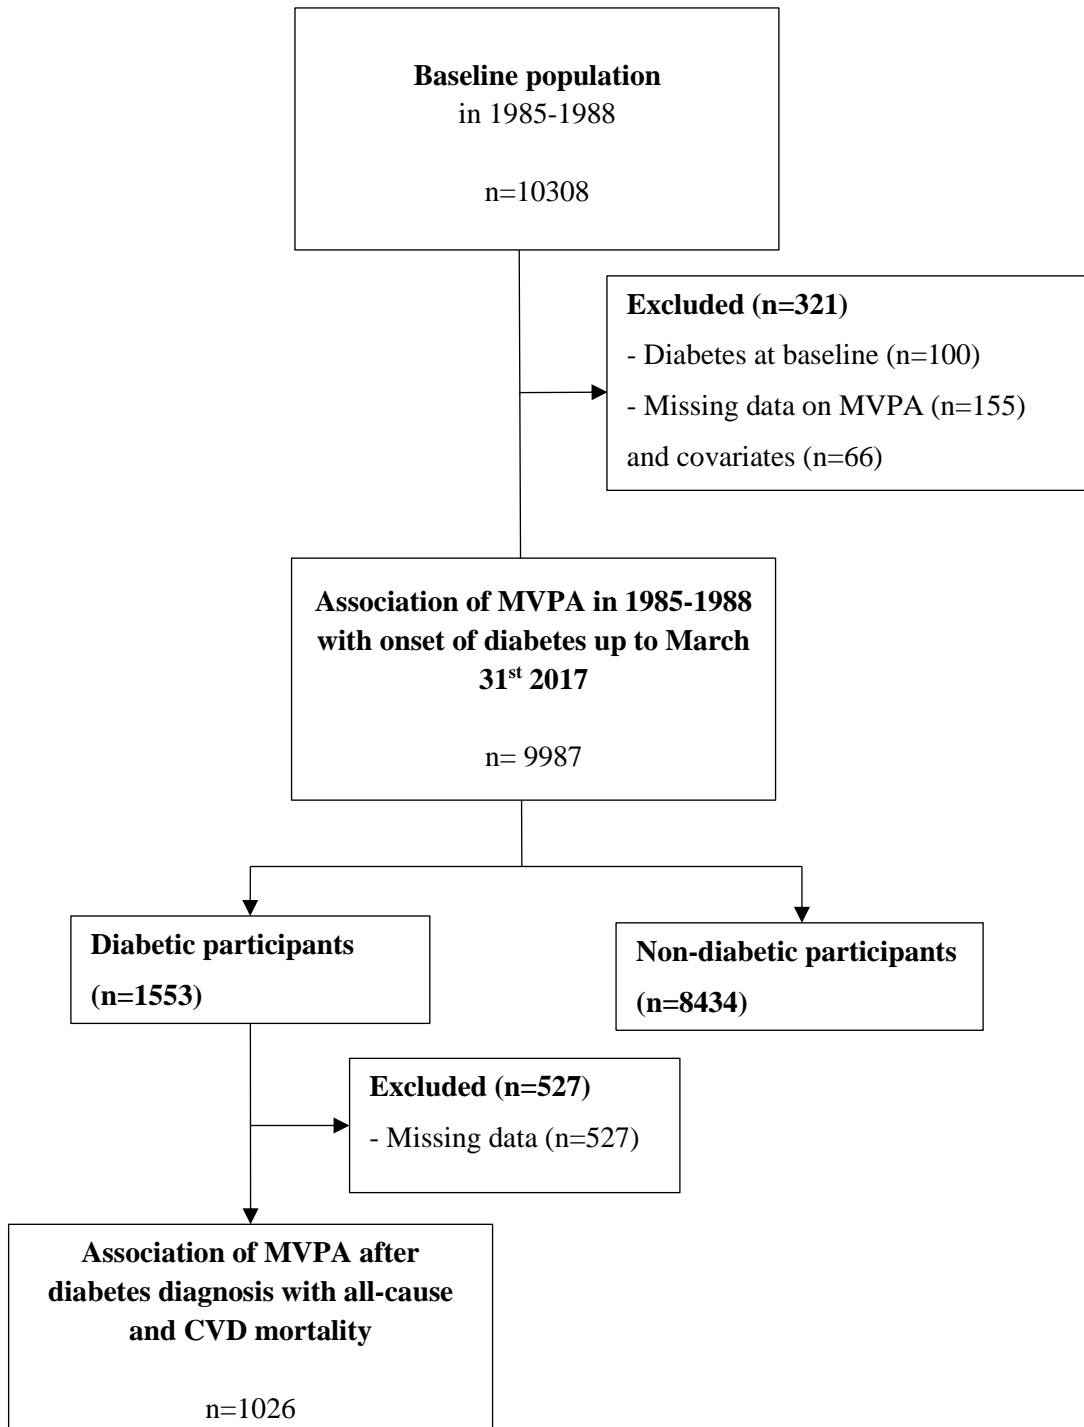

ESM Fig 1: Study flow chart of sample selection

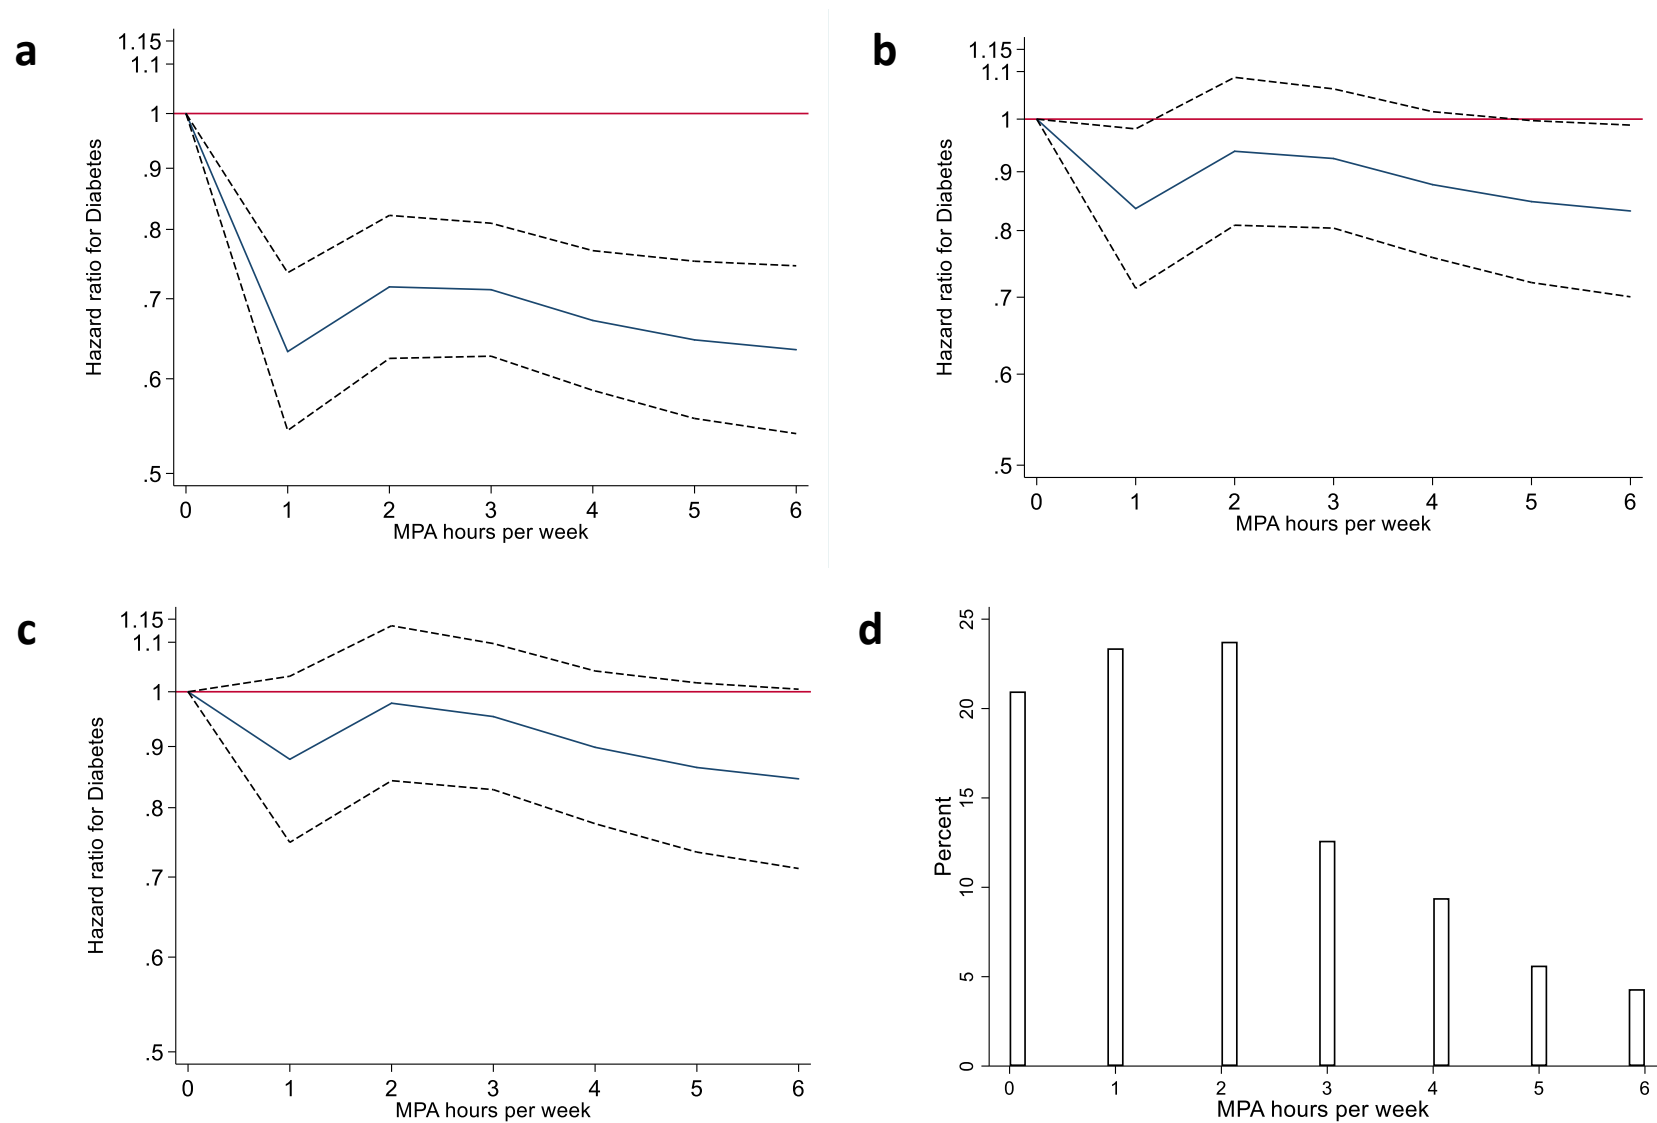

ESM Fig 2: Dose-response relation of moderate physical activity with risk of incident diabetes. **(a)** crude model; **(b)** adjusted for age (time-scale), sex, ethnicity, education, occupational grade, marital status, smoking status, alcohol consumption, fruits & vegetables intake and VPA; **(c)** additionally adjusted for BMI, hypertension, total cholesterol, CVD drugs, and prevalent CVD; **(d)** population distribution. Blue line represents the HR using restricted cubic spline regression models (5 knots). The reference value (HR=1) is 0 hour/week. Black dash lines are 95 % CI. MPA, moderate physical activity; VPA, vigorous physical activity.



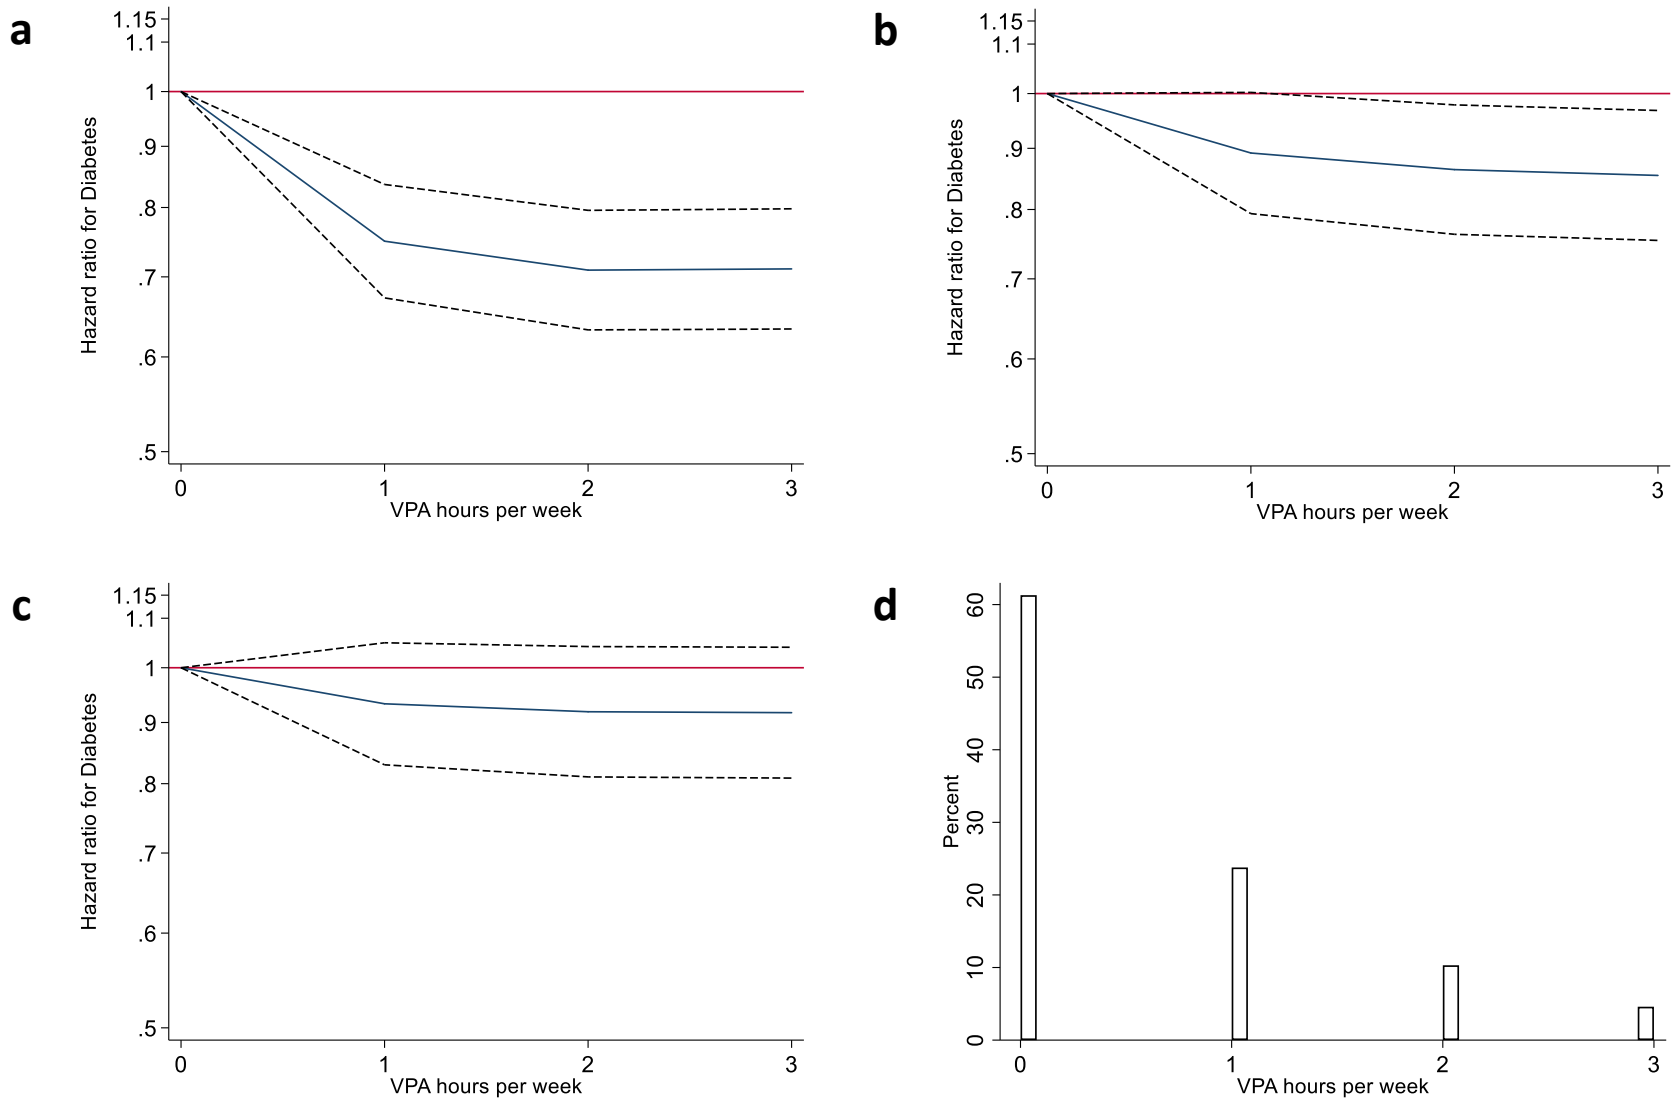

ESM Fig 3: Dose-response relation of vigorous physical activity with risk of incident diabetes. **(a)** crude model; **(b)** adjusted for age (time-scale), sex, ethnicity, education, occupational grade, marital status, smoking status, alcohol consumption, fruits & vegetables intake and MPA; **(c)** additionally adjusted for BMI, hypertension, total cholesterol, CVD drugs, and prevalent CVD; **(d)** population distribution. Blue line represents the HR using restricted cubic spline regression models (3 knots). The reference value (HR=1) is 0 hour/week. Black dash lines are 95 % CI. VPA, vigorous physical activity; MPA moderate physical activity.

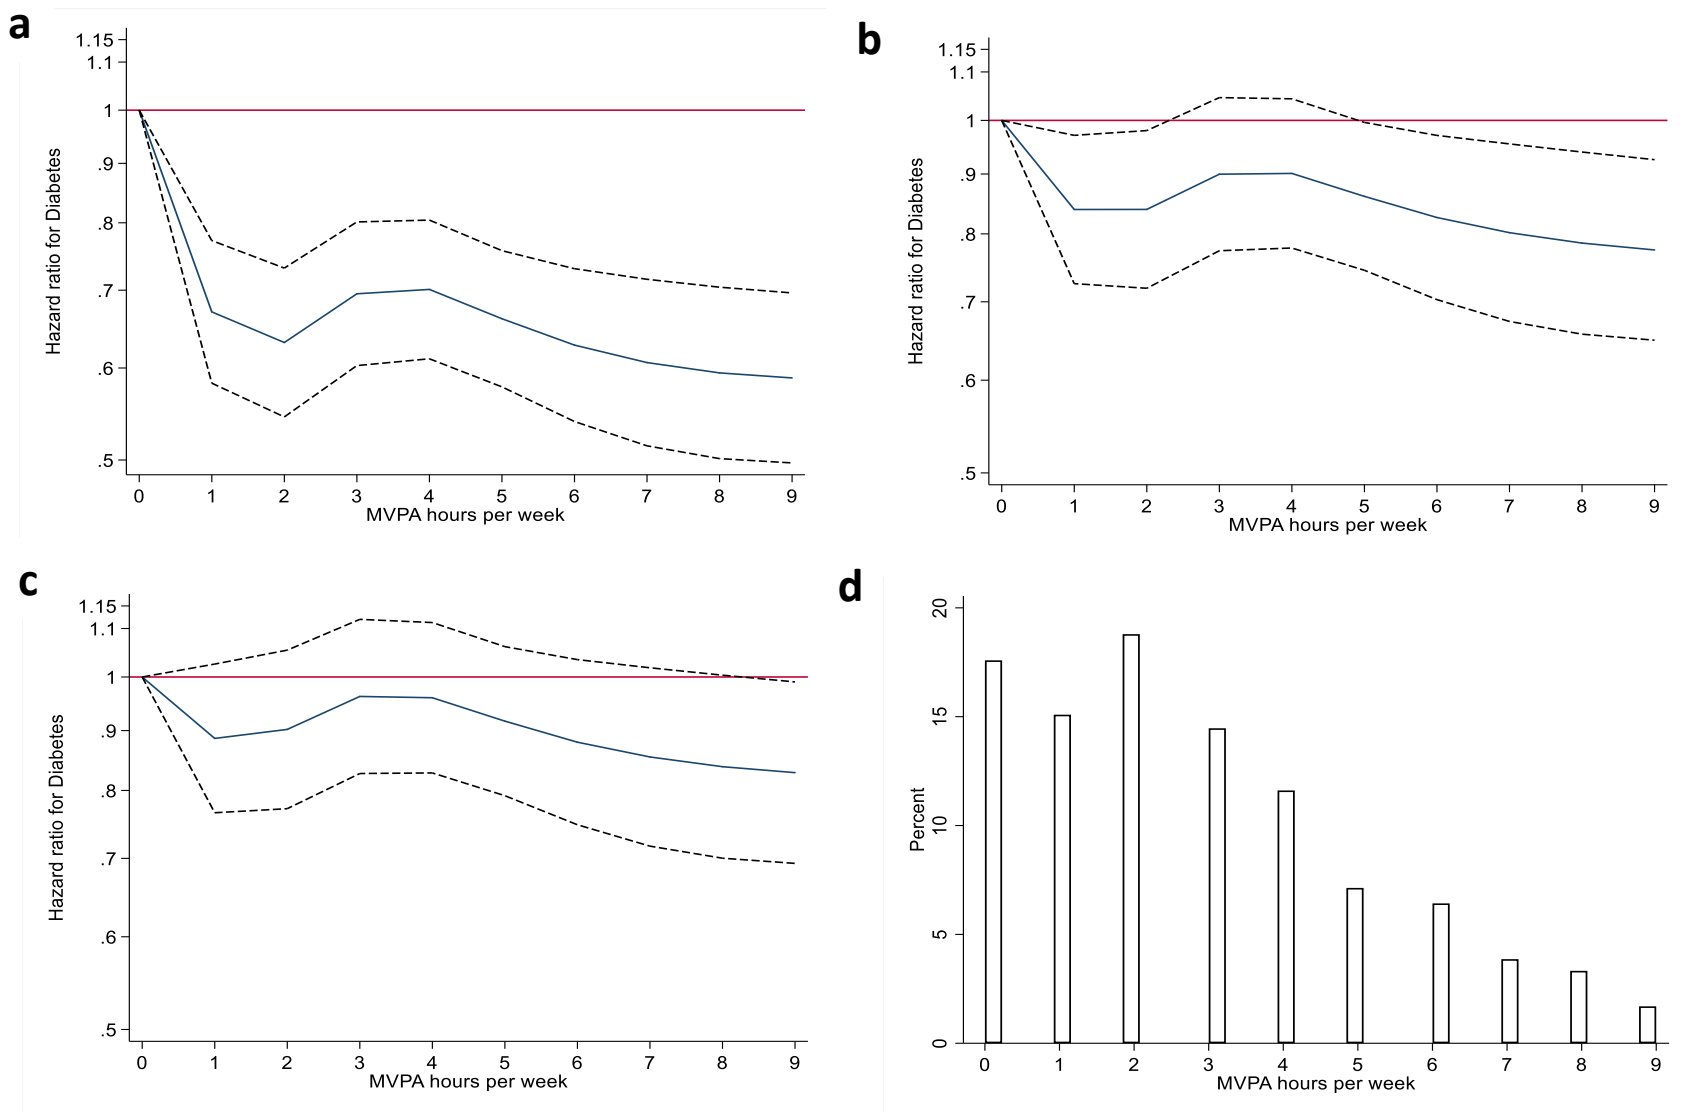

ESM Fig 4: Dose-response relation of moderate-to-vigorous physical activity with risk of incident diabetes. **(a)** crude model; **(b)** adjusted for age (time-scale), sex, ethnicity, education, occupational grade, marital status, smoking status, alcohol consumption, fruits & vegetables intake and MPA; **(c)** additionally adjusted for BMI, hypertension, total cholesterol, CVD drugs, and prevalent CVD; **(d)** population distribution. Blue line represents the HR using restricted cubic spline regression models (5 knots). The reference value (HR=1) is 0 hour/week. Black dash lines are 95 % CI. MVPA, moderate-to-vigorous physical activity.

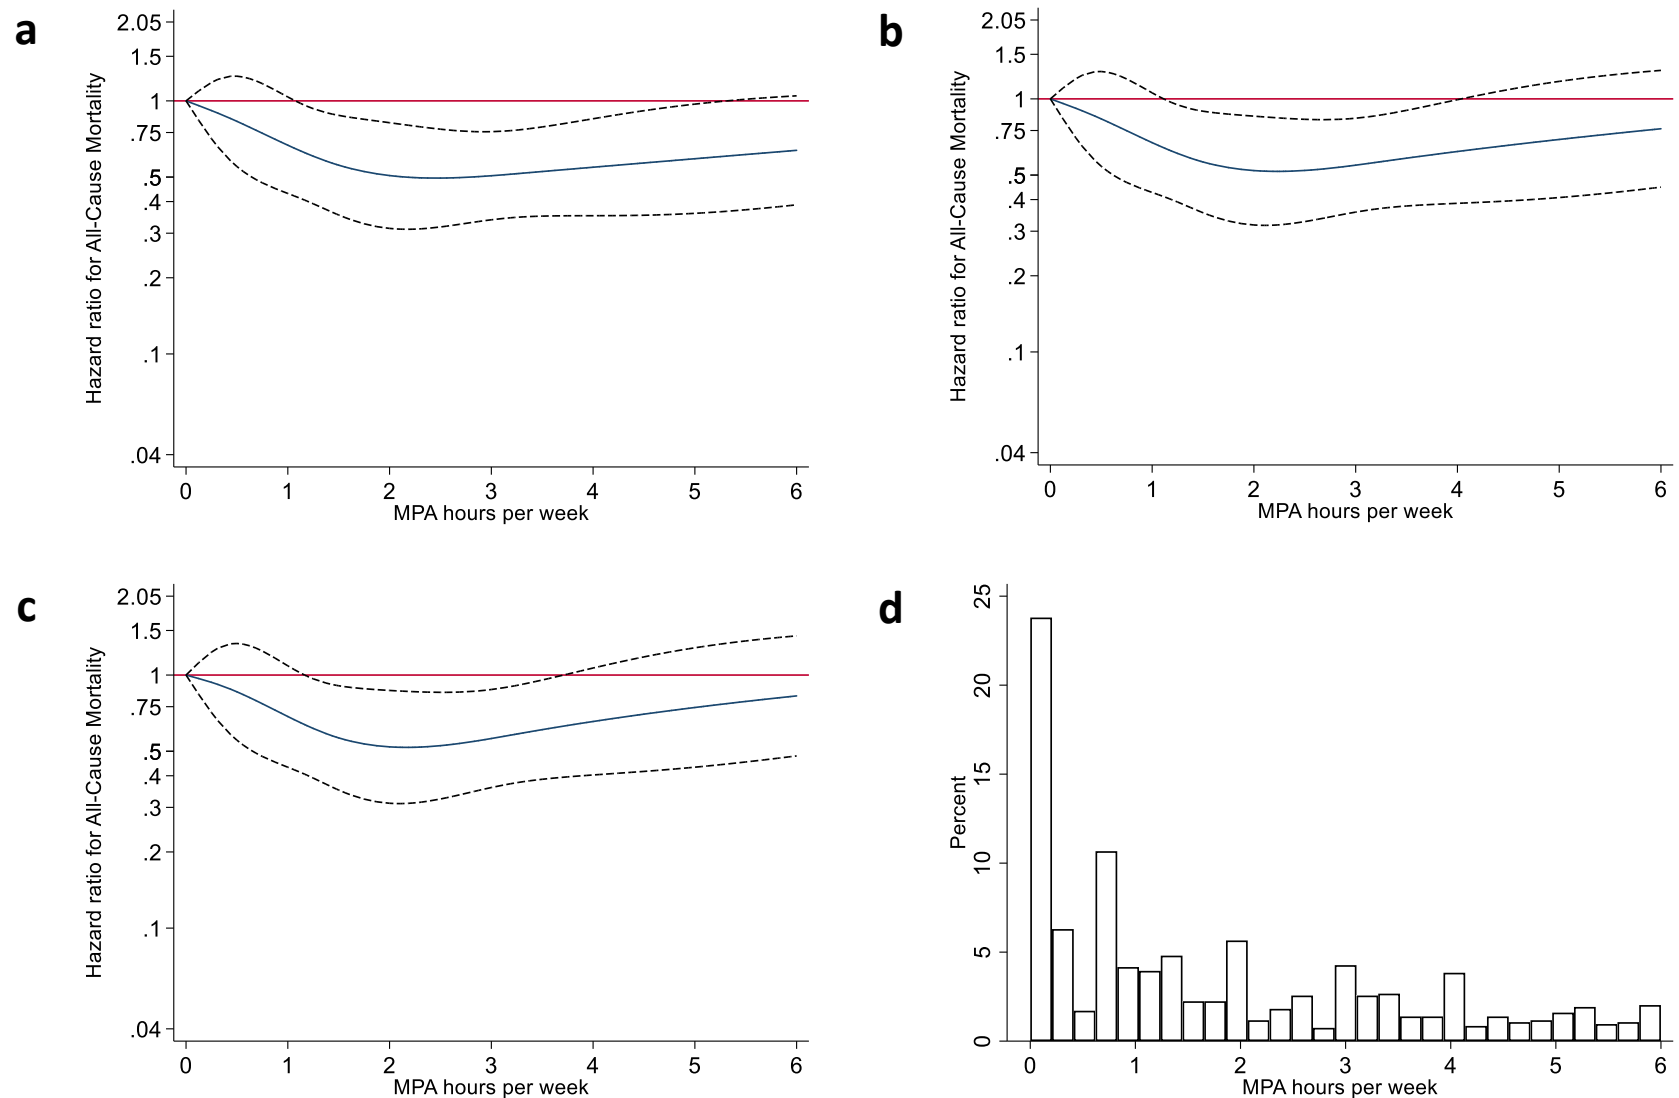

ESM Fig 5: Association of moderate physical activity post-diabetes diagnosis with risk of all-cause mortality. (a) crude model; (b) adjusted for age (time-scale), sex, ethnicity, education, occupational grade, marital status, smoking status, alcohol consumption, fruits & vegetables intake and VPA; (c) additionally adjusted for BMI, hypertension, total cholesterol, SF-36 mental and physical component summary scores, CVD drugs and prevalent CVD; (d) population distribution. Blue line represents the HR inverse probability weighted restricted cubic spline regression models (5 knots). The reference value (HR=1) is 0 hour/week. Black dash lines are 95 % CI. MPA, moderate physical activity; VPA, vigorous physical activity.

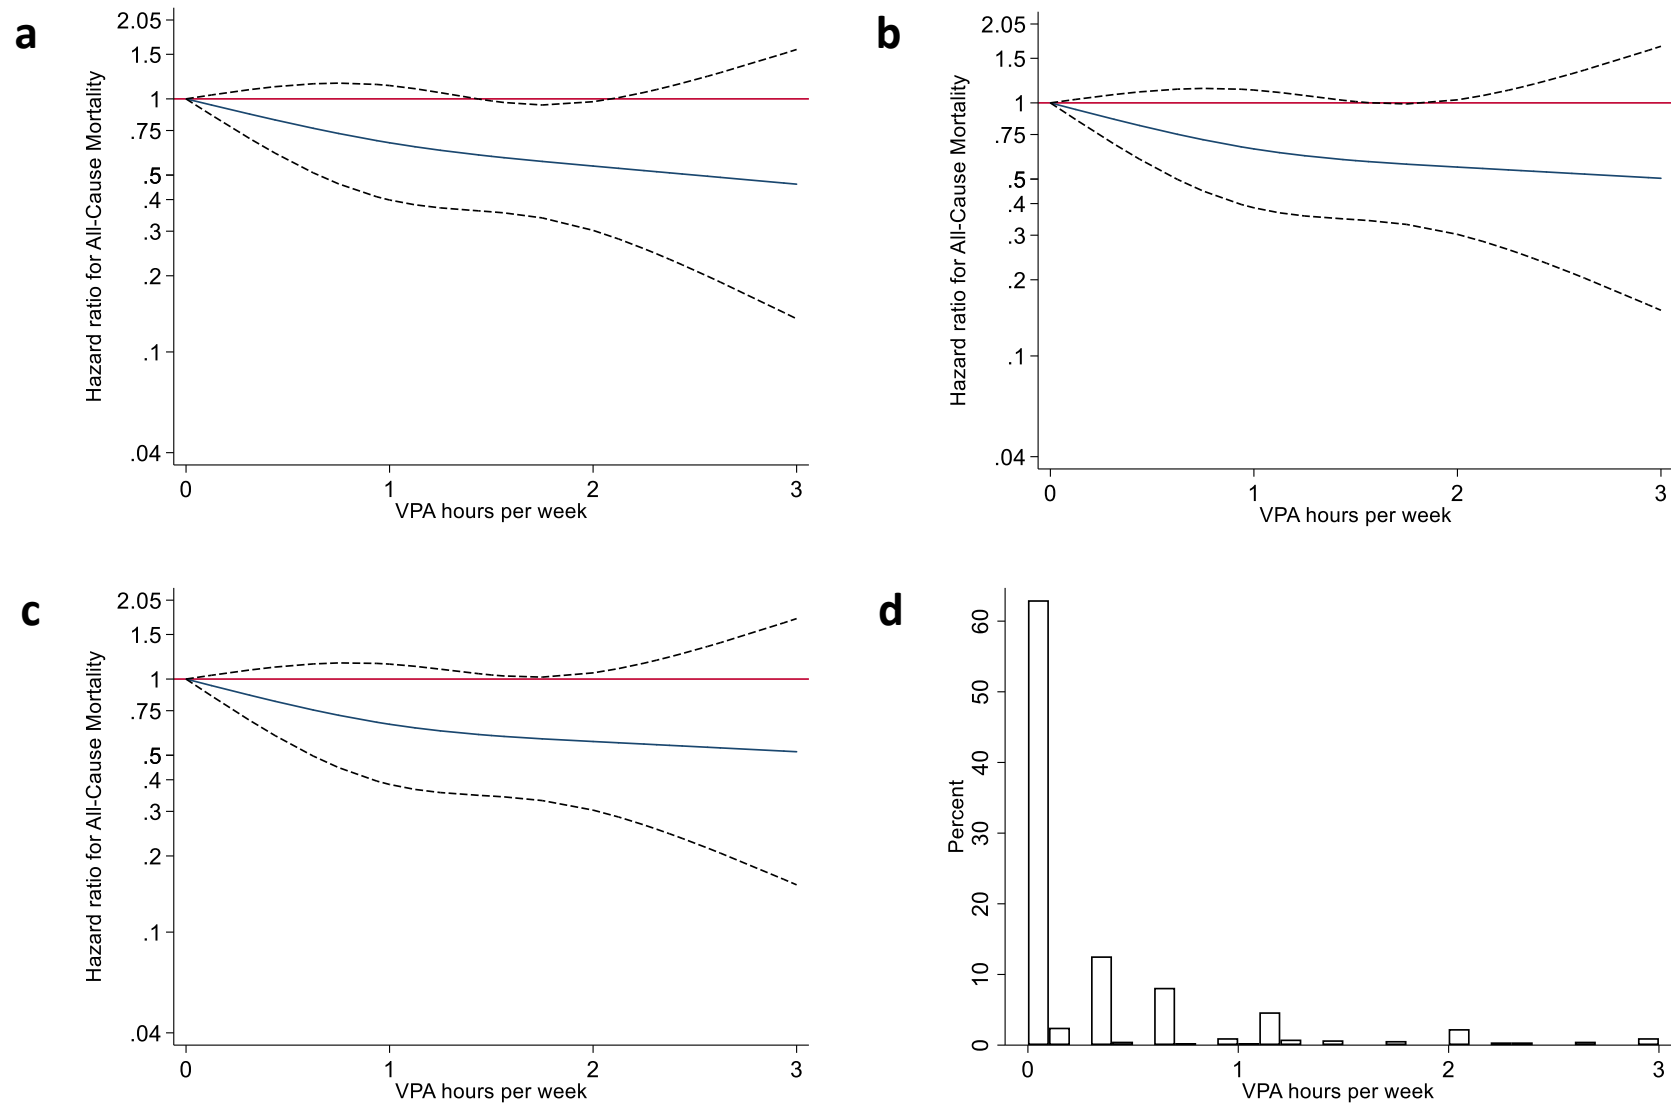

ESM Fig 6: Association of vigorous physical activity post-diabetes diagnosis with risk of all-cause mortality. (a) crude model; (b) adjusted for age (time-scale), sex, ethnicity, education, occupational grade, marital status, smoking status, alcohol consumption, fruits & vegetables intake and MPA; (c) additionally adjusted for BMI, hypertension, total cholesterol, SF-36 mental and physical component summary scores, CVD drugs and prevalent CVD; (d) population distribution. Blue line represents the HR using inverse probability weighted restricted cubic spline regression models (3 knots). The reference value (HR=1) is 0 hour/week. Black dash lines are 95 % CI. VPA, vigorous physical activity; MPA, moderate physical activity.

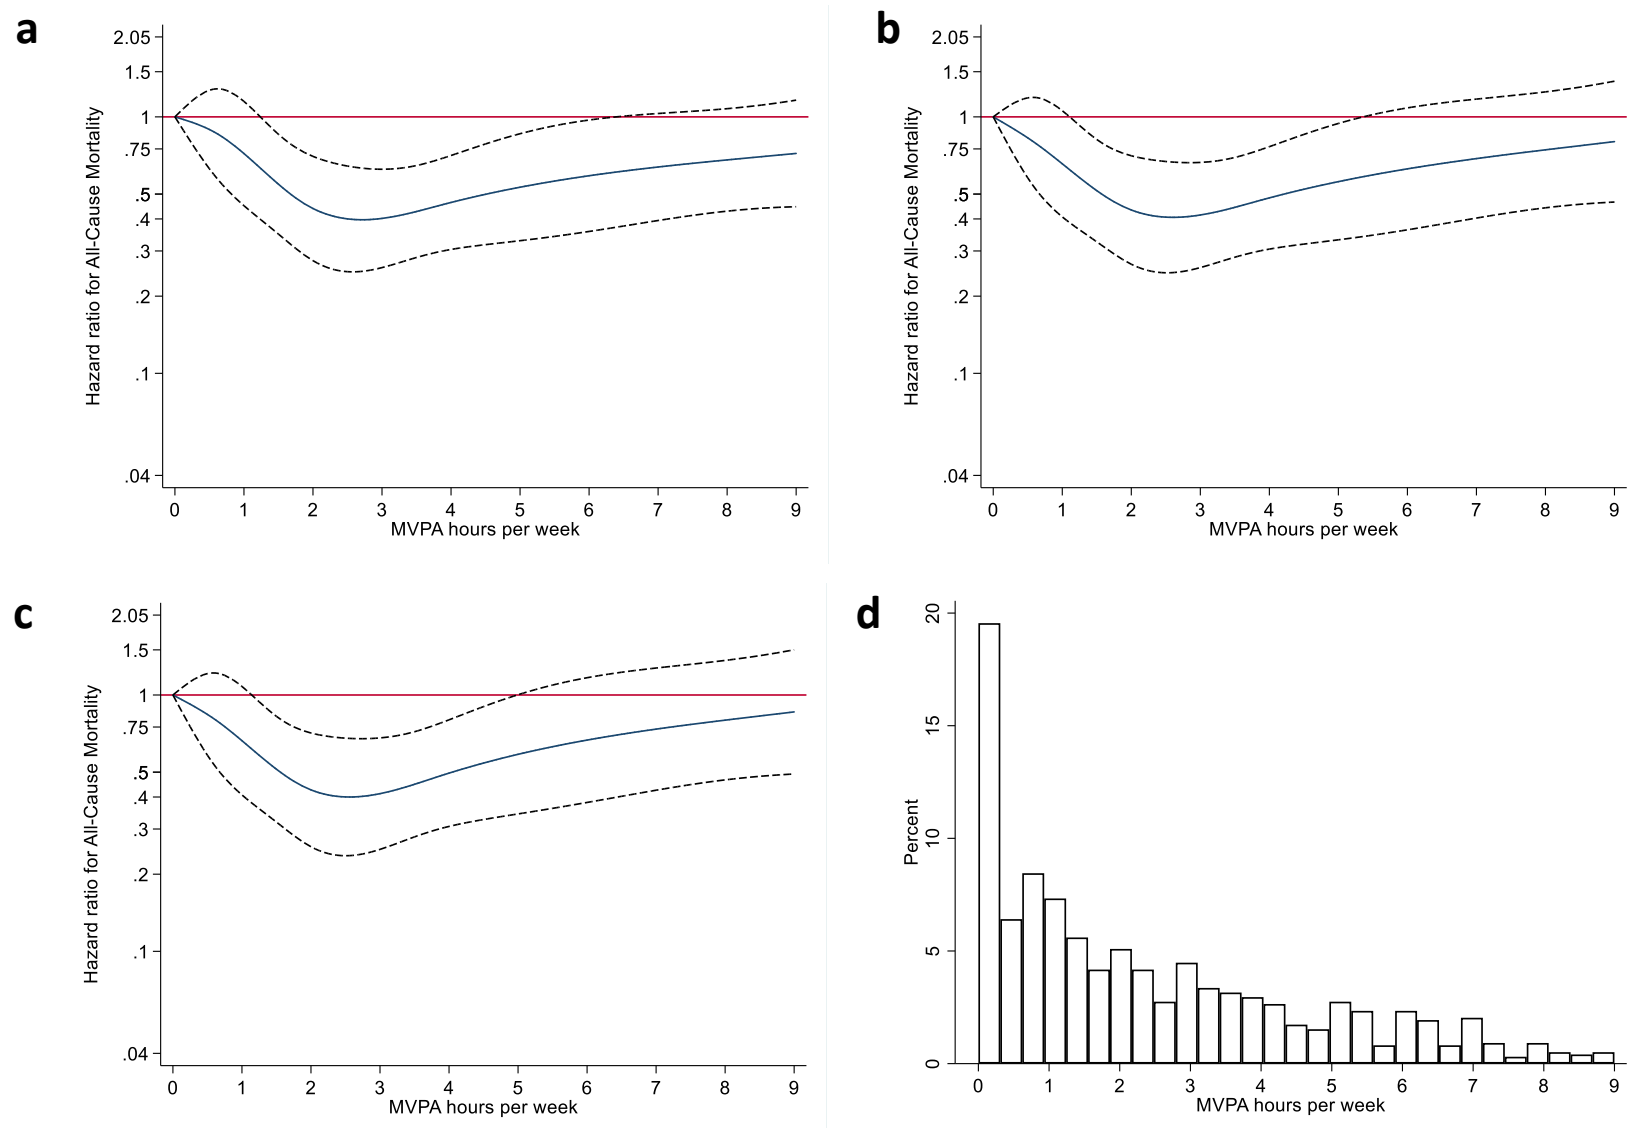

ESM Fig 7: Association of moderate-to-vigorous physical activity post-diabetes diagnosis with risk of all-cause mortality. (a) crude model; (b) adjusted for age (time-scale), sex, ethnicity, education, occupational grade, marital status, smoking status, alcohol consumption, fruits & vegetables intake; (c) additionally adjusted for BMI, hypertension, total cholesterol, SF-36 mental and physical component summary scores, CVD drugs and prevalent CVD; (d) population distribution. Blue line represents the HR using inverse probability weighted restricted cubic spline regression models (5 knots). The reference value (HR=1) is 0 hour/week. Black dash lines are 95 % CI. MVPA, moderate-to-vigorous physical activity.

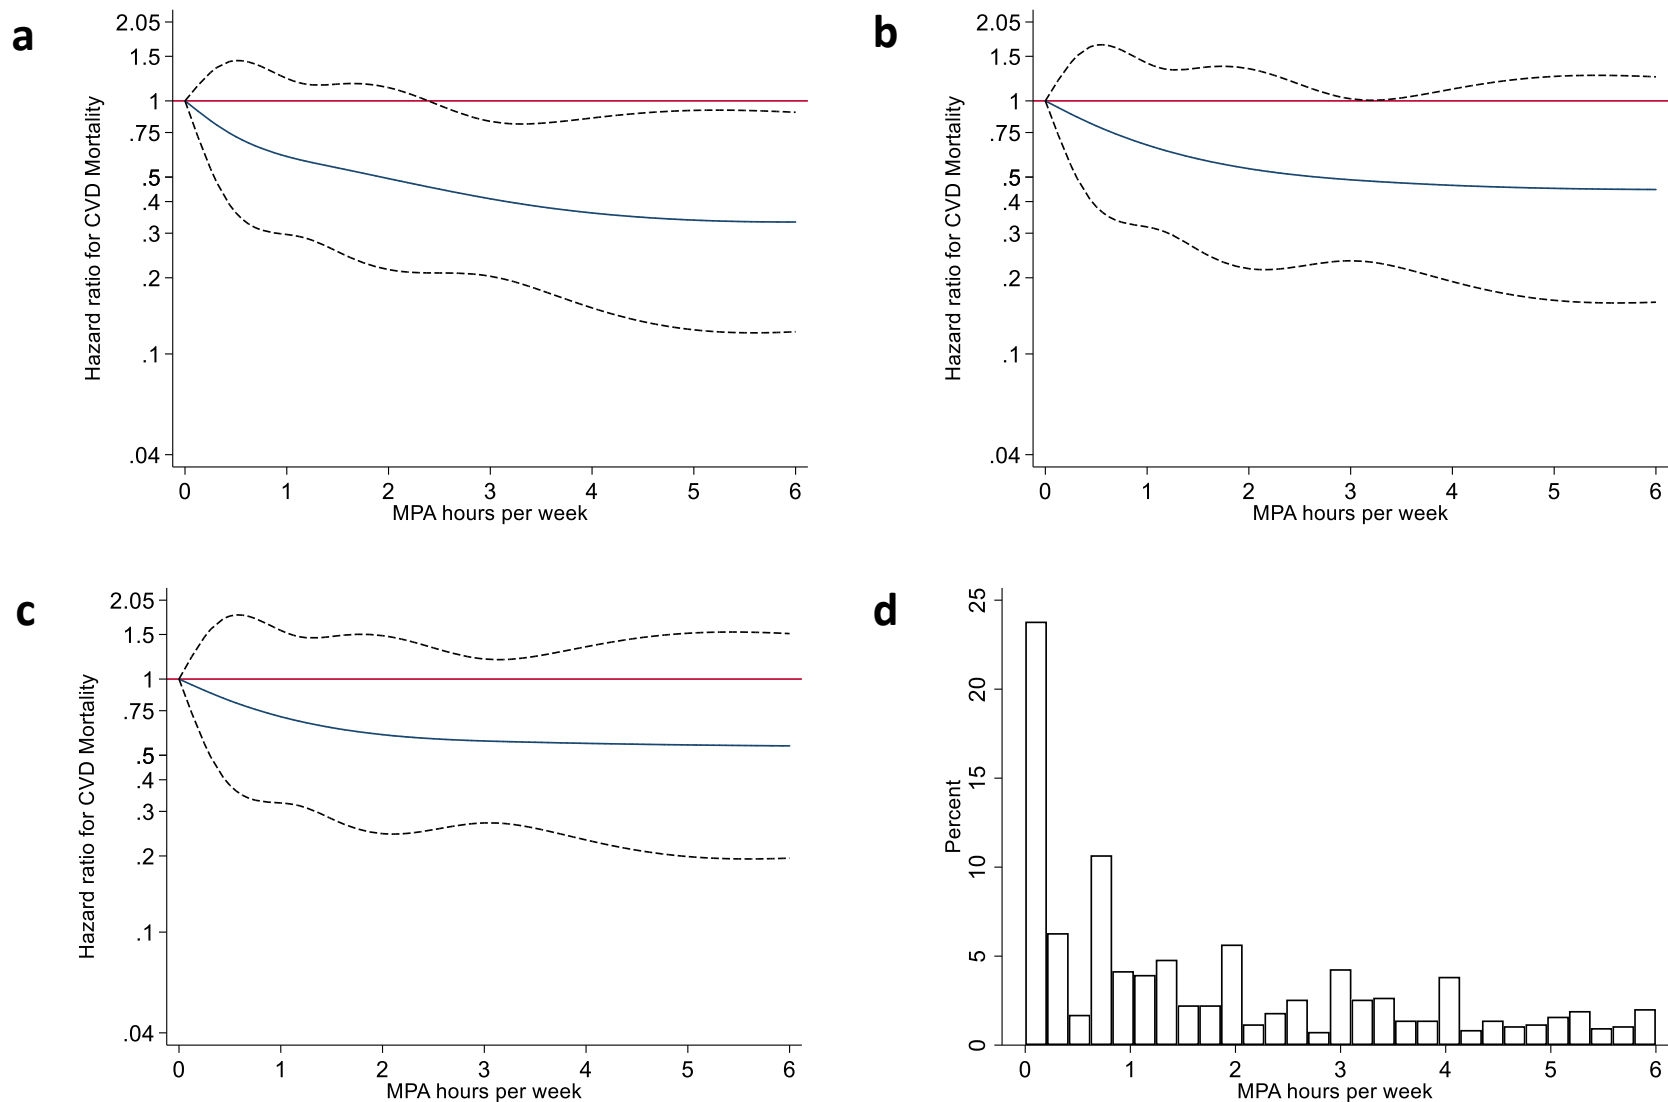

ESM Fig 8: Association of moderate physical activity post-diabetes diagnosis with risk of CVD mortality. (a) crude model; (b) adjusted for age (time-scale), sex, ethnicity, education, occupational grade, marital status, smoking status, alcohol consumption, fruits & vegetables intake and VPA; (c) additionally adjusted for BMI, hypertension, total cholesterol, SF-36 mental and physical component summary scores, CVD drugs and prevalent CVD; (d) population distribution. Blue line represents the HR using inverse probability weighted restricted cubic spline regression models (5 knots). The reference value (HR=1) is 0 hour/week. Black dash lines are 95 % CI. MPA, moderate physical activity; VPA, vigorous physical activity.

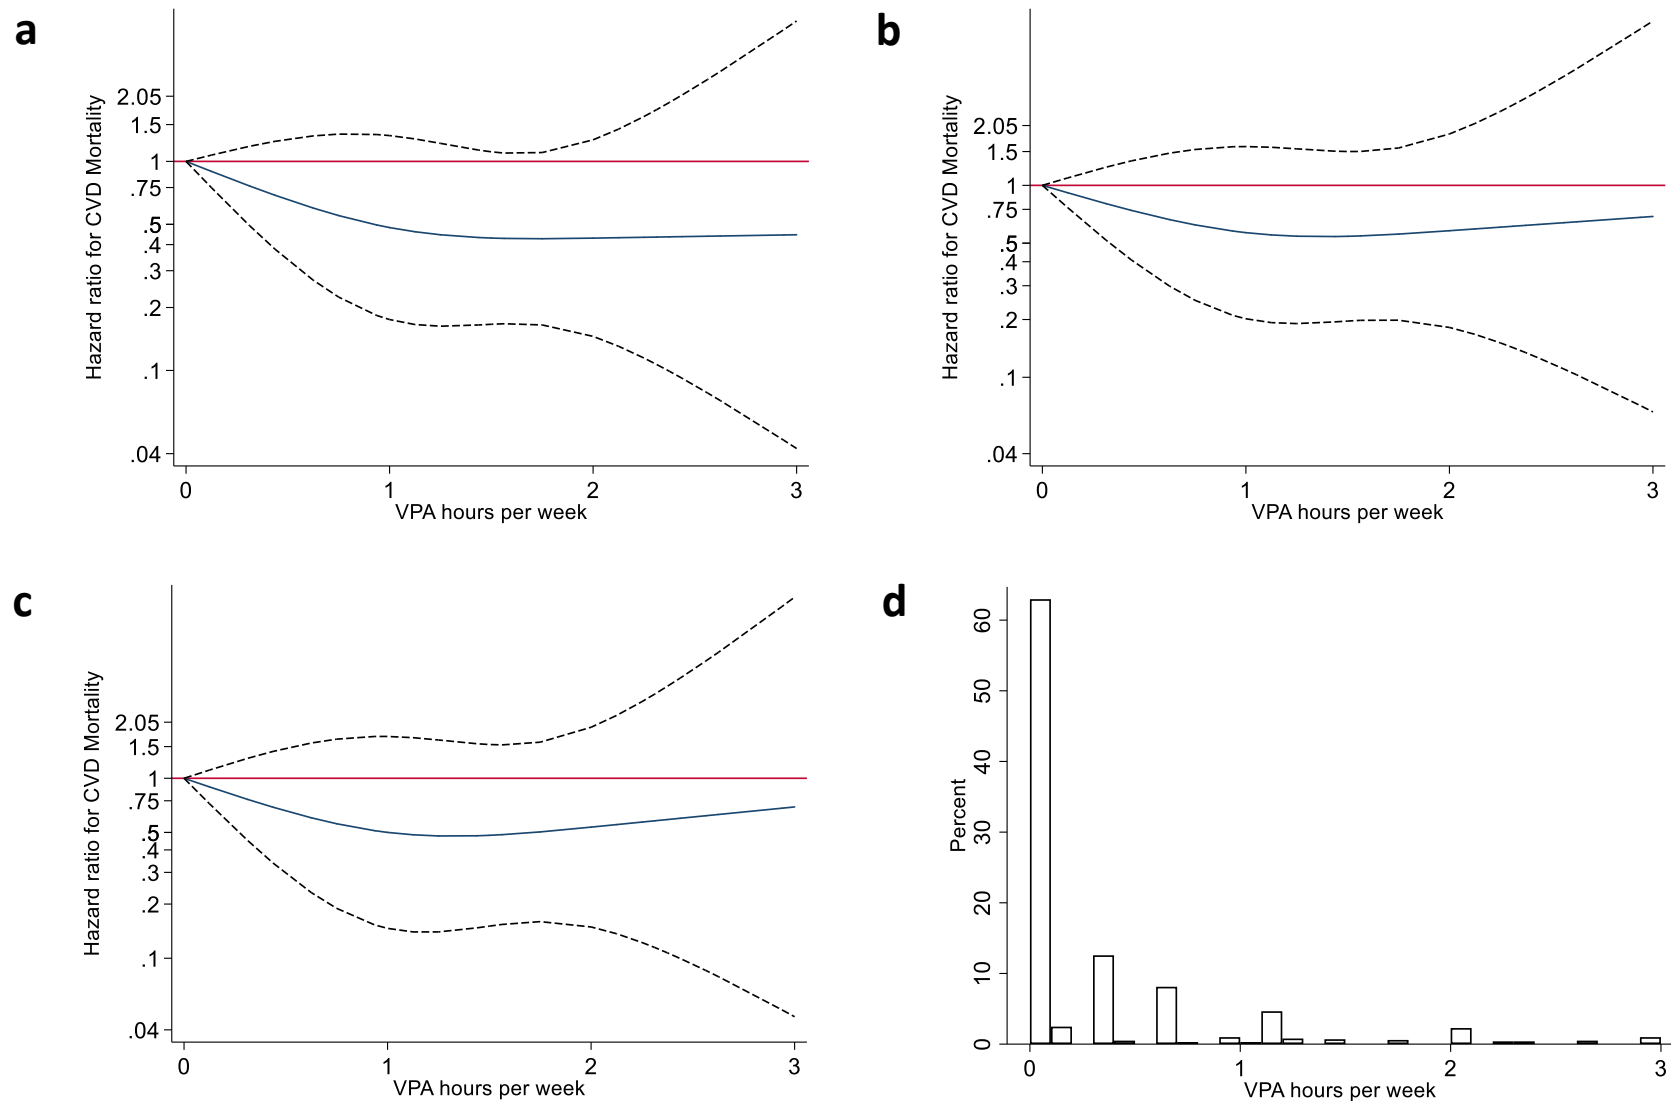

ESM Fig 9: Association of vigorous physical activity post-diabetes diagnosis with CVD mortality. (a) crude model; (b) adjusted for age (time-scale), sex, ethnicity, education, occupational grade, marital status, smoking status, alcohol consumption, fruits & vegetables intake and MPA; (c) additionally adjusted for BMI, hypertension, total cholesterol, SF-36 mental and physical component summary scores, CVD drugs and prevalent CVD; (d) population distribution. Blue line represents the HR using inverse probability weighted restricted cubic spline regression models (3 knots). The reference value (HR=1) is 0 hour/week. Black dash lines are 95 % CI. VPA, vigorous physical activity; MPA, moderate physical activity.

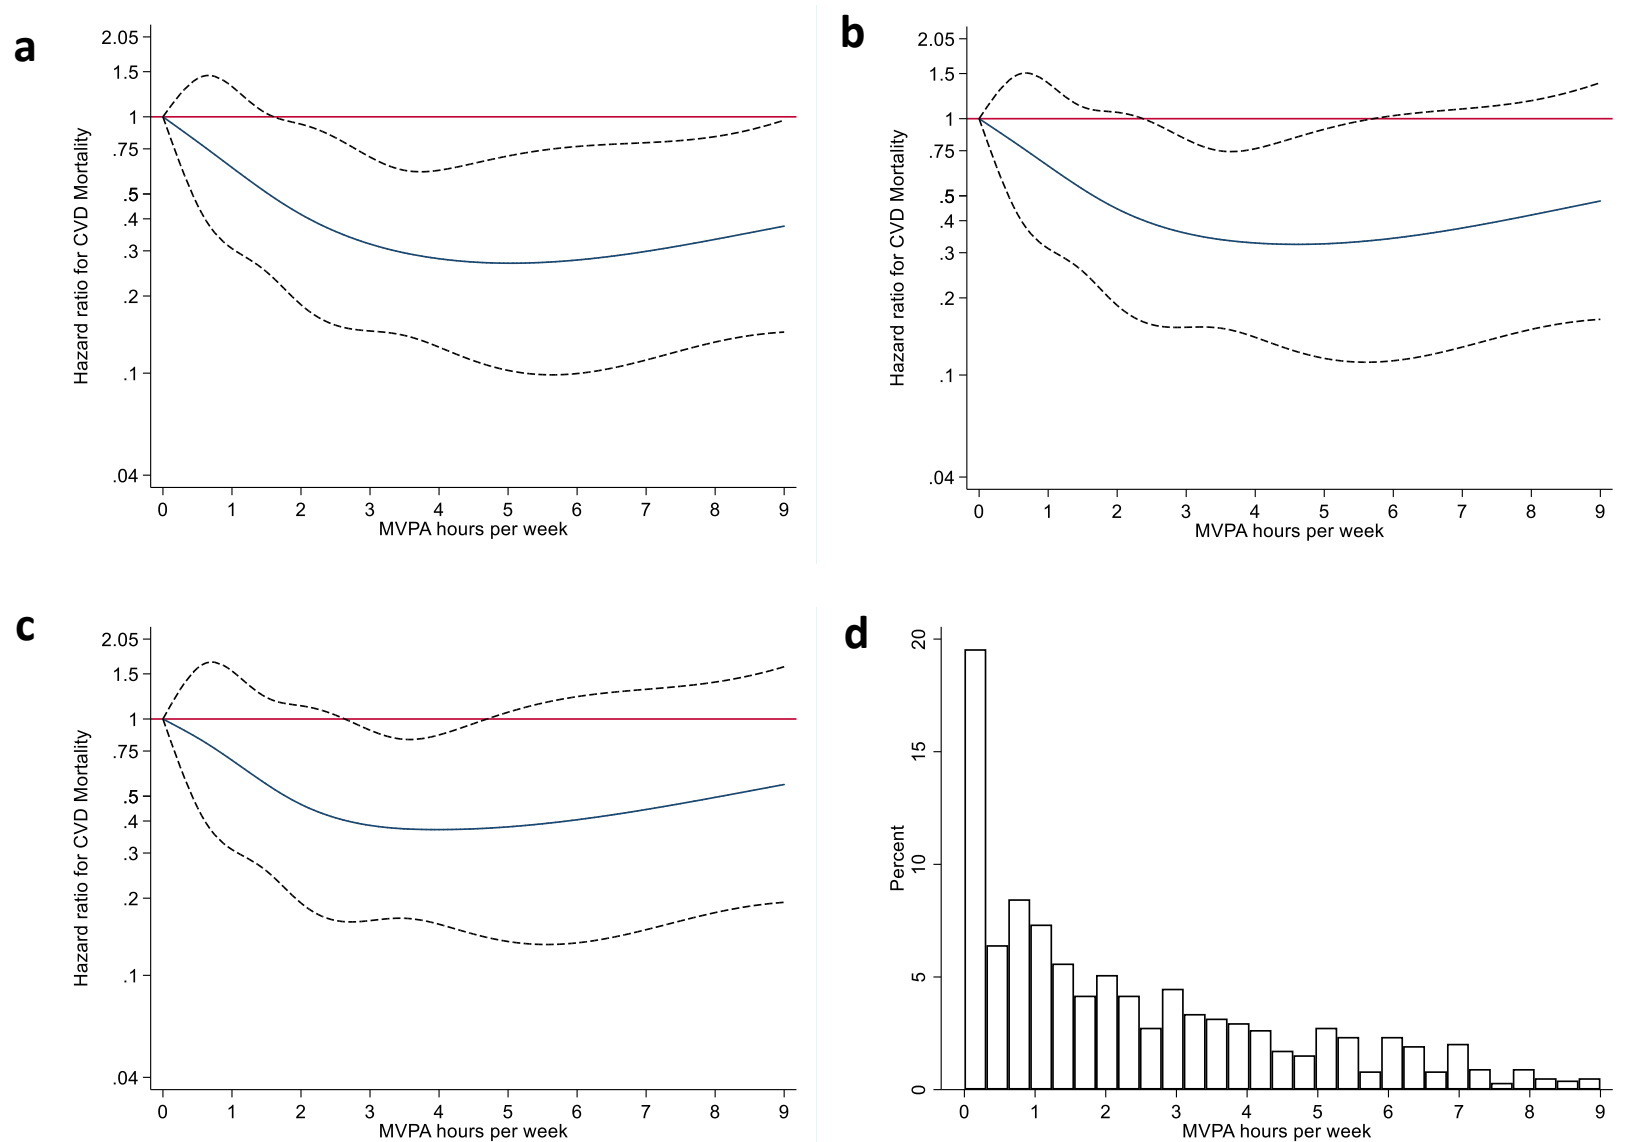

ESM Fig 10: Association of moderate-to-vigorous physical activity post-diabetes diagnosis with CVD mortality. (a) crude model; (b) adjusted for age (time-scale), sex, ethnicity, education, occupational grade, marital status, smoking status, alcohol consumption and fruits & vegetables intake; (c) additionally adjusted for BMI, hypertension, total cholesterol, SF-36 mental and physical component summary scores, CVD drugs and prevalent CVD; (d) population distribution. Blue line represents the HR using inverse probability weighted restricted cubic spline regression models (5 knots). The reference value (HR=1) is 0 hour/week. Black dash lines are 95 % CI. MVPA, moderate-to-vigorous physical activity.
